# Supplementary material
Source: PubMed Central journal article supplement (PMC3613920)
Supplement: JCI65822sd.pdf [file JCI65822sd.pdf]

## Supplemental Material

### Supplemental Methods

#### *TF-1a lymphoblastic leukemia cell line: marking with GFP, phenotyping and sorting*

In order to determine if the multi-parameter FACS approach would be successful across different human malignancies, another human leukemic cell line, TF-1a was used in a second spiked sorting experiment. TF-1a, a lymphoblastic cell line derived from a 35year old Japanese male with erythroblastic leukemia was obtained from American Type Culture Collection (ATCC)(1). Previous sensitivity analyses had demonstrated that TF-1a cells do not form solid tumors as consistently as MOLT-4 cells when transplanted into the testes of immune-deficient nude mice. Thus, TF-1a cells were transduced with a lentivirus containing GFP driven by the ubiquitin-C promoter (generously provided by Dr. Carlos Lois, University of Massachusetts (2)) to enable tracking of malignant cells through the multi-parameter FACS experiments. The cell culture was then expanded and cloned by limiting dilution. Cells derived from a single GFP-expressing clone, TF-1a (C2), were used for all experiments in this study. Cultures were established in RPMI-1640 media (GIBCO, Invitrogen) with 10% FBS and supplemented with antibiotic-antimycotic solution containing penicillin, streptomycin, and amphotericin (Anti-Anti, GIBCO Invitrogen Cell Culture). Fresh media was added every 2-3 days and cells were passaged at or before they reached a density of  $2 \times 10^6$  cells/mL as per manufacturer recommendations.

Initial flow cytometry experiments using the TF-1a-GFP clone demonstrated that over >95% of cells expressed the markers CD45 and CD49e, but not HLA-ABC (as we had observed for the MOLT-4 leukemic cells). Additionally, EpCAM was expressed on <1% of the TF-1a cells. Thus, our multi-parameter sorting approach with TF-1a utilized CD45-PE and CD49e-PE as markers for TF-1a leukemic cells, and EpCAM-APC as a marker of spermatogonia. Spiked

sorting experiments were carried out as described in the main body of the manuscript by adding TF-1a-GFP cells to a suspension of human testicular cells and performing multi-parameter FACS.

### ***Immunohistochemistry of testicular tumors with NuMA***

In order to demonstrate that the testicular tumors observed after transplantation of MOLT-4 cells and the EpCAM<sup>-</sup>/CD49e<sup>+</sup>/HLA-ABC<sup>+</sup> fraction resulted from the MOLT-4 cells injected and are of human origin, immunohistochemistry was performed with a human-specific polyclonal antibody directed against the nuclear mitosis apparatus protein (NuMA), a protein involved in the formation and maintenance of the mitotic spindle. To accomplish this, the tumors were fixed with 4% paraformaldehyde overnight, paraffin-embedded and sectioned (5 µm). The tissue slides were then deparaffinized, rehydrated, and incubated in sodium citrate buffer (10 mM sodium citrate, pH 6.0, 0.05% Tween-20) for antigen retrieval. The tissue was then blocked with a buffer containing 3% bovine serum albumin and 5% normal serum from the host species of the secondary antibody. Subsequently, sections were stained for 90 minutes at room temperature with anti-NuMA antibody (1:100, Abcam, Cambridge, MA). Isotype matched normal IgG was used as negative control. Primary antibody was detected using AlexaFluor-488 conjugated secondary antibody. The slides were mounted with VectaShield mounting medium containing DAPI (Vector Laboratories) for detection of nuclei. Sections were observed with a Nikon Eclipse E600 Fluorescence microscope and images captured with MetaView Digital Imaging software.

**Supplemental Table 1:** Expression pattern of various cell surface antigens on MOLT-4 lymphoblastic leukemia cells and human testicular cell suspensions (expressed in percentage)

| Cell surface antigen        | MOLT-4      | Human testis |
|-----------------------------|-------------|--------------|
| CD4                         | 75.9 ± 13.5 | 0.14 ± 0.02  |
| CD9                         | 68.9 ± 6.0  | 16.1 ± 0.4   |
| CD24                        | 0.17 ± 0.07 | 2.46 ± 0.3   |
| CD29 (β1 integrin)          | 98.3 ± 0.5  | 24.4 ± 3.7   |
| CD31 (PECAM-1)              | 51.8 ± 2.3  | 1.1 ± 0.3    |
| CD34                        | 4.5 ± 1.7   | 15.96 ± 1.1  |
| CD45                        | 97.9 ± 0.9  | 3.56 ± 0.6   |
| CD49e (α5 integrin)         | 97.6 ± 0.9  | 23.2 ± 4.2   |
| CD49f (α6 integrin)         | 12.5 ± 1.7  | 53.2 ± 8.7   |
| CD54                        | 56.1 ± 7.7  | 26.1 ± 3.5   |
| CD71 (transferrin receptor) | 91.6 ± 1.0  | 0.46 ± 0.2   |
| CD90 (Thy 1)                | 2.2 ± 0.5   | 21.1 ± 1.3   |
| CD147                       | 98.3 ± 0.5  | 53.1 ± 14.6  |
| CD326 (EpCAM)               | 0.1 ± 0.0   | 16.4 ± 3.9   |
| HLA-ABC                     | 96.9 ± 1.2  | 9.42 ± 0.7   |

# Human Testis

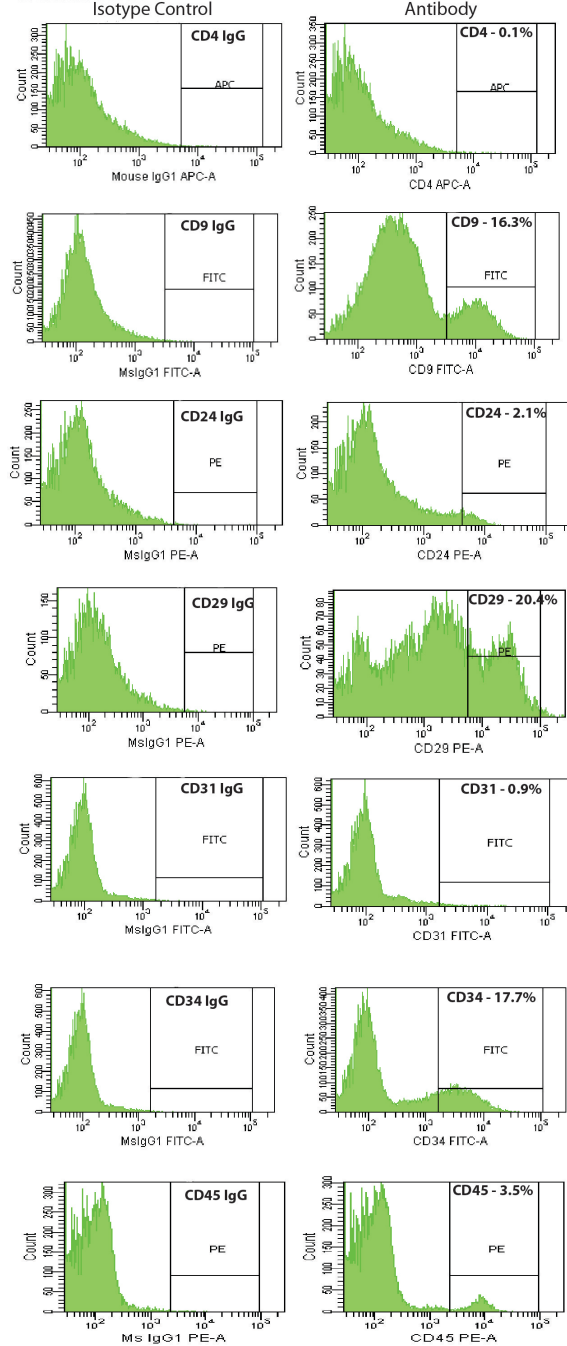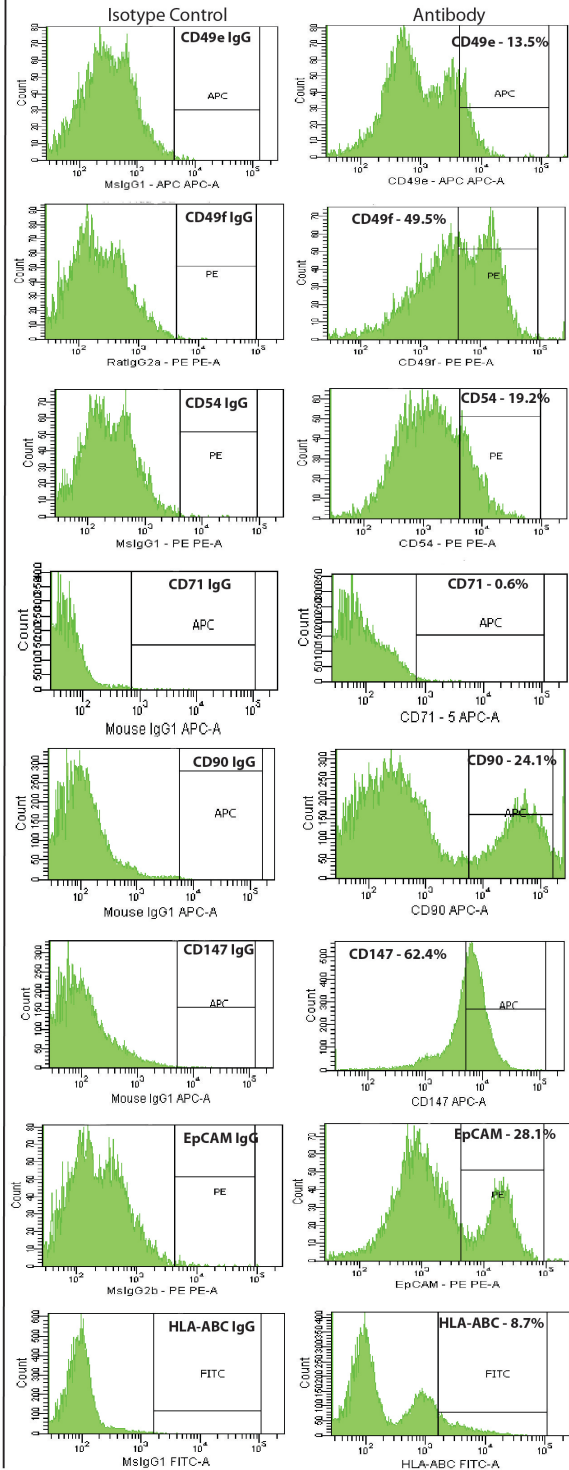

**Supplemental Figure 1A:** Histograms from flow cytometry demonstrating the percentage of human testicular cells that stained positively for the cell surface antigens analyzed, relative to isotype (IgG) controls. Gating was established to exclude 99.9% of isotype control events.

# MOLT4

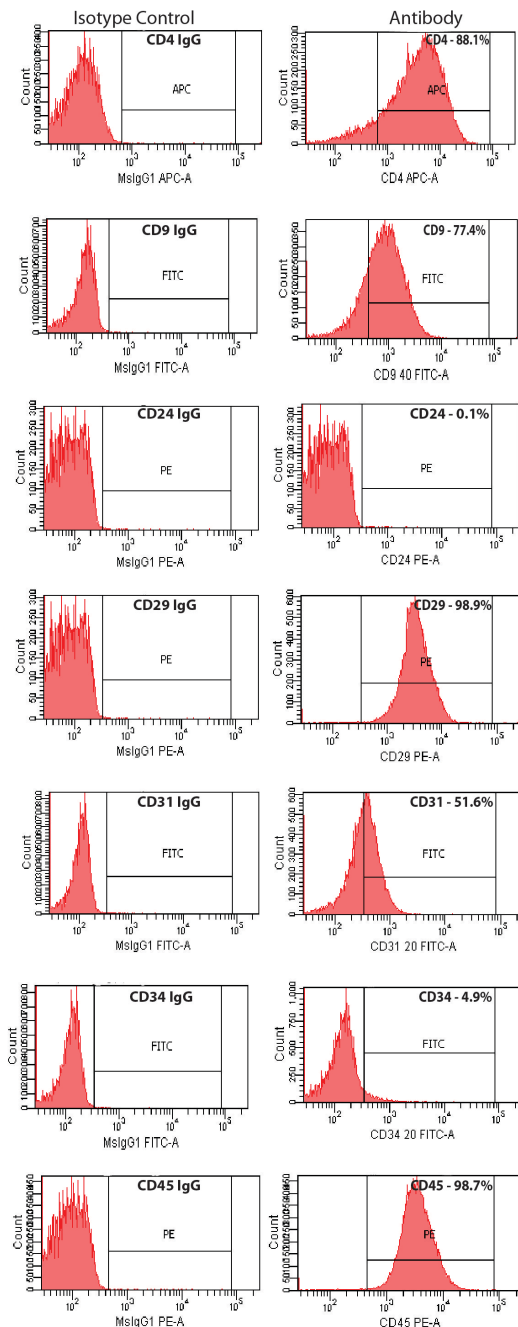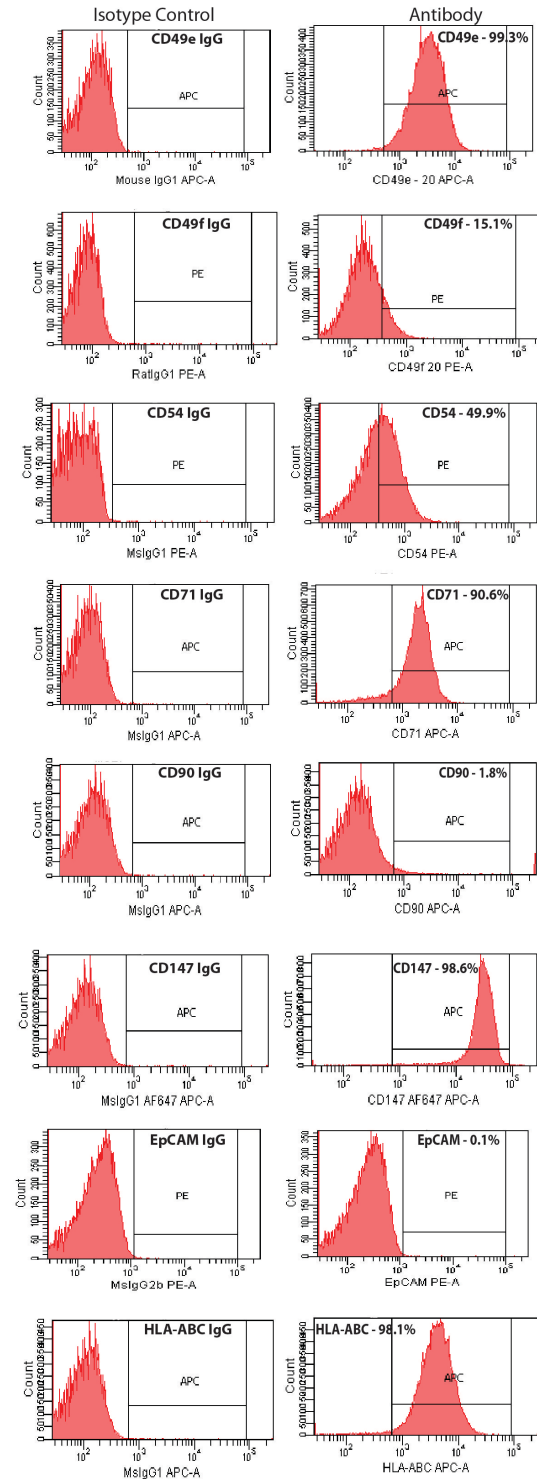

**Supplemental Figure 1B:** Histograms from flow cytometry demonstrating the percentage of MOLT-4 leukemic cells that stained positively for the cell surface antigens analyzed, relative to isotype (IgG) controls. Gating was established to exclude 99.9% of isotype control events.

**Supplemental Table 2:** Characteristics of human testis organ donors

| <b>Donor</b> | <b>Age range</b> | <b>Race</b> | <b>Time to tissue<br/>processing<br/>(hours)</b> | <b>Cell viability<br/>prior to<br/>cryopreservation</b> |
|--------------|------------------|-------------|--------------------------------------------------|---------------------------------------------------------|
| 1            | 10-19            | Caucasian   | 11                                               | 93.2%                                                   |
| 2            | 21               | Caucasian   | 7.5                                              | 91.9%                                                   |
| 3            | 20-29            | Unknown     | 14                                               | 92.6%                                                   |
| 4            | 14               | Caucasian   | 12.5                                             | 90.2%                                                   |
| 5            | 16               | Caucasian   | 8                                                | 79.1%                                                   |
| 6            | 40-49            | Caucasian   | 20.8                                             | 96.3%                                                   |
| 7            | 41               | Unknown     | 9                                                | 92.7%                                                   |

**Supplemental Table 3:** Manufacturing company, fluorophore, clone, and staining concentration of antibodies used in flow cytometry with human testicular cell suspensions and the MOLT-4 cell line

| Cell surface antigen         | Antibody-conjugated fluorophore | Company       | Clone     | Concentration               |
|------------------------------|---------------------------------|---------------|-----------|-----------------------------|
| CD4                          | APC                             | BD Pharmingen | L200      | 20 uL/10 <sup>6</sup> cells |
| CD9                          | FITC                            | BD Pharmingen | M-L13     | 20 uL/10 <sup>6</sup> cells |
| CD24                         | PE                              | BD Pharmingen | 2H7       | 10 uL/10 <sup>6</sup> cells |
| CD29 ( $\beta$ 1 integrin)   | PE                              | BD Pharmingen | MAR4      | 40 uL/10 <sup>6</sup> cells |
| CD31 (PECAM-1)               | FITC                            | BD Pharmingen | WM59      | 20 uL/10 <sup>6</sup> cells |
| CD34                         | FITC                            | AbCAM         | QBEND/10  | 20 uL/10 <sup>6</sup> cells |
| CD45                         | PE                              | BD Pharmingen | TU116     | 20 uL/10 <sup>6</sup> cells |
| CD49e ( $\alpha$ 5 integrin) | APC<br>PE                       | BioLegend     | NK1-SAM-1 | 20 uL/10 <sup>6</sup> cells |
| CD49f ( $\alpha$ 6 integrin) | PE                              | BD Pharmingen | GoH3      | 20 uL/10 <sup>6</sup> cells |
| CD54                         | PE                              | BioLegend     | HCD54     | 20 uL/10 <sup>6</sup> cells |
| CD71 (transferrin receptor)  | APC                             | BD Pharmingen | L01.1     | 10 uL/10 <sup>6</sup> cells |
| CD90 (Thy 1)                 | APC                             | BD Pharmingen | 5E10      | 1 ug/10 <sup>6</sup> cells  |
| CD147                        | AlexaFluor 647                  | BioLegend     | HIM6      | 5 uL/10 <sup>6</sup> cells  |
| CD326 (EpCAM)                | PE                              | BioLegend     | 9C4       | 20 uL/10 <sup>6</sup> cells |
| CD326 (EpCAM)                | APC                             | BioLegend     | 9C4       | 5 uL/10 <sup>6</sup> cells  |
| HLA-ABC                      | APC                             | BD Pharmingen | G46-2.6   | 20 uL/10 <sup>6</sup> cells |

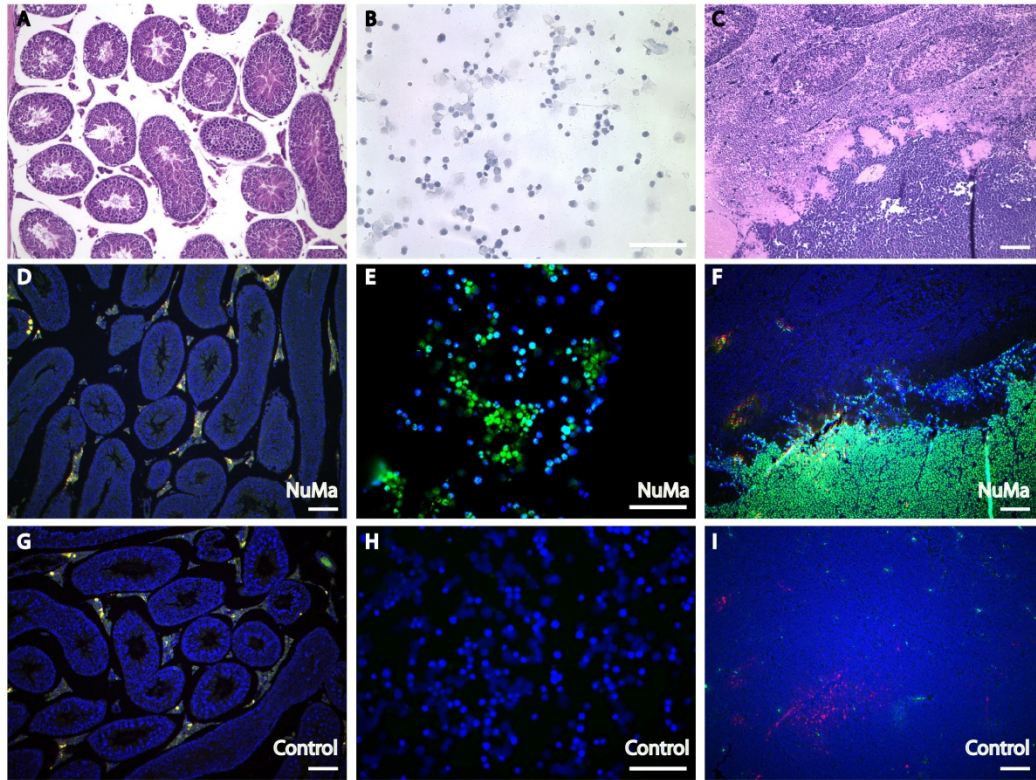

**Supplemental Figure 2:** Testicular tumors observed after transplantation of the EpCAM<sup>+</sup>/CD49e<sup>+</sup>/HLA-ABC<sup>+</sup> fraction following FACS are of human origin. **A, D and G)** Cross-section from nude mouse testis demonstrating normal architecture of the seminiferous tubules stained with hematoxylin and eosin (H&E, Panel A). Panel D demonstrates negative staining with the human-specific nuclear mitosis apparatus protein (NuMA). Panel G is stained with an IgG isotype control. **B, E and H)** MOLT-4 leukemic cells stained with H&E (panel B), NuMA antibody (panel E), and with an IgG isotype control (panel H). NuMA is expressed by a variety of human malignancies, including MOLT-4 leukemic cells, as demonstrated in panel E. **C, F and I)** Testis from nude mouse demonstrating gross tumor formation following transplantation of EpCAM<sup>+</sup>/CD49e<sup>+</sup>/HLA-ABC<sup>+</sup> cells. Disruption of the normal architecture of the seminiferous tubules by the MOLT-4 leukemic cells can be visualized in panel C (bottom right), and these cells stain positively for NuMA (panel F). Panel I is MOLT-4-derived tumor stained with an IgG isotype control. Scale bar = 100µm.

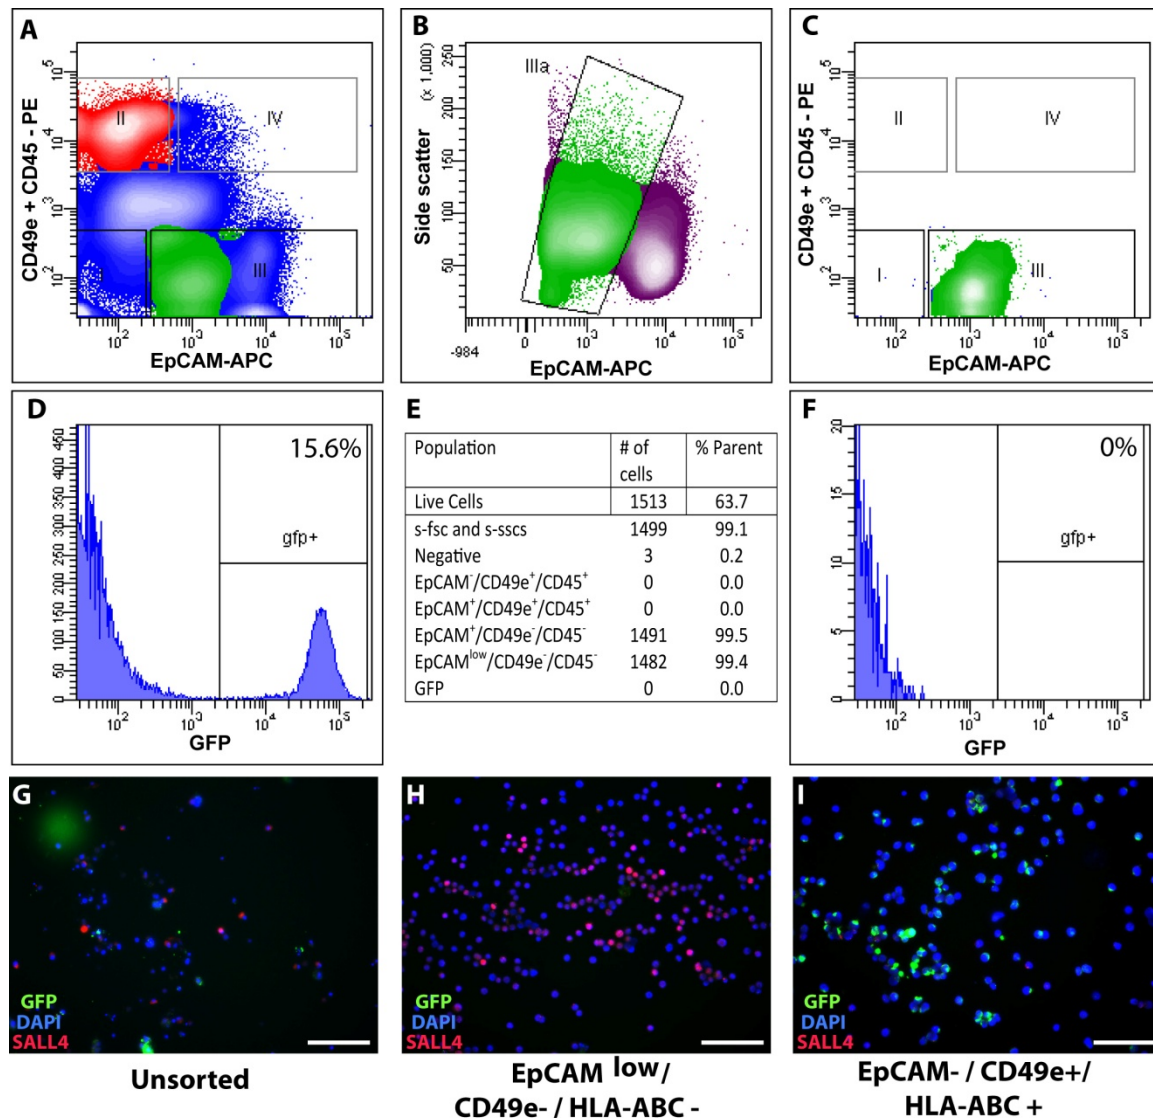

**Supplemental Figure 3:** Separation of TF-1a-GFP cells and human spermatogonia from a contaminated human testis cell suspension using a multi-parameter FACS approach. **A and D)** Human testicular cell suspensions were “spiked” with TF-1a-GFP cells (15.6%) and then FACS was performed using EpCAM-APC, CD49e-PE and CD45-PE. **B)** Fraction III in (A) was further analyzed with side scatter, as previously described, to identify the spermatogonial fraction, EpCAM<sup>low</sup>/side scatter<sup>high</sup> (green, fraction IIIA). **C and E)** Purity check indicated that the EpCAM<sup>low</sup>/side scatter<sup>high</sup> (green, fraction IIIA) fraction was 99.4% pure and contained and contained no GFP positive cells (**E and F**), representing the TF-1a leukemic cells. **G-I)** Unsorted and sorted cell fractions were evaluated by immunocytochemistry for SALL-4 (human spermatogonia) and GFP (TF-1a-GFP). We focused on fractions II (red) and IIIA (green) because these were expected to contain TF-1a leukemic cells and human spermatogonia, respectively. The EpCAM<sup>low</sup>/CD49e<sup>-</sup>/CD45<sup>-</sup> fraction (IIIA) contained SALL-4 positive spermatogonia, but not GFP positive TF-1a cells (panel H). The EpCAM<sup>+</sup>/CD49e<sup>+</sup>/CD45<sup>+</sup> fraction (II) contained GFP positive TF-1a cells, but not SALL4 positive spermatogonia (panel I). Scale bars = 100  $\mu$ m.

### Supplemental References

1. Hu, X., Moscinski, L.C., Hill, B.J., Chen, Q., Wu, J., Fisher, A.B., and Zuckerman, K.S. 1998. Characterization of a unique factor-independent variant derived from human factor-dependent TF-1 cells: a transformed event. *Leukemia research* 22:817-826.
2. Lois, C., Hong, E.J., Pease, S., Brown, E.J., and Baltimore, D. 2002. Germline transmission and tissue-specific expression of transgenes delivered by lentiviral vectors. *Science* 295:868-872.
